# Supplementary material
Source: publisher figshare collection journal article supplement (https://acs.figshare.com/ndownloader/files/4172449)

**A Single Step Approach to Piperidines Via Ni-Catalyzed  $\beta$ -Carbon Elimination**

**SUPPORTING INFORMATION : SPECTRA**

Puneet Kumar and Janis Louie<sup>\*</sup>

Henry Eyring Building, Department of Chemistry, University of Utah, 315 South 1400 East, Salt Lake City,  
Utah 84112-0850

<sup>\*</sup>louie@chem.utah.edu

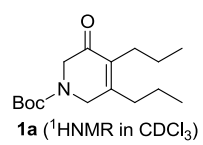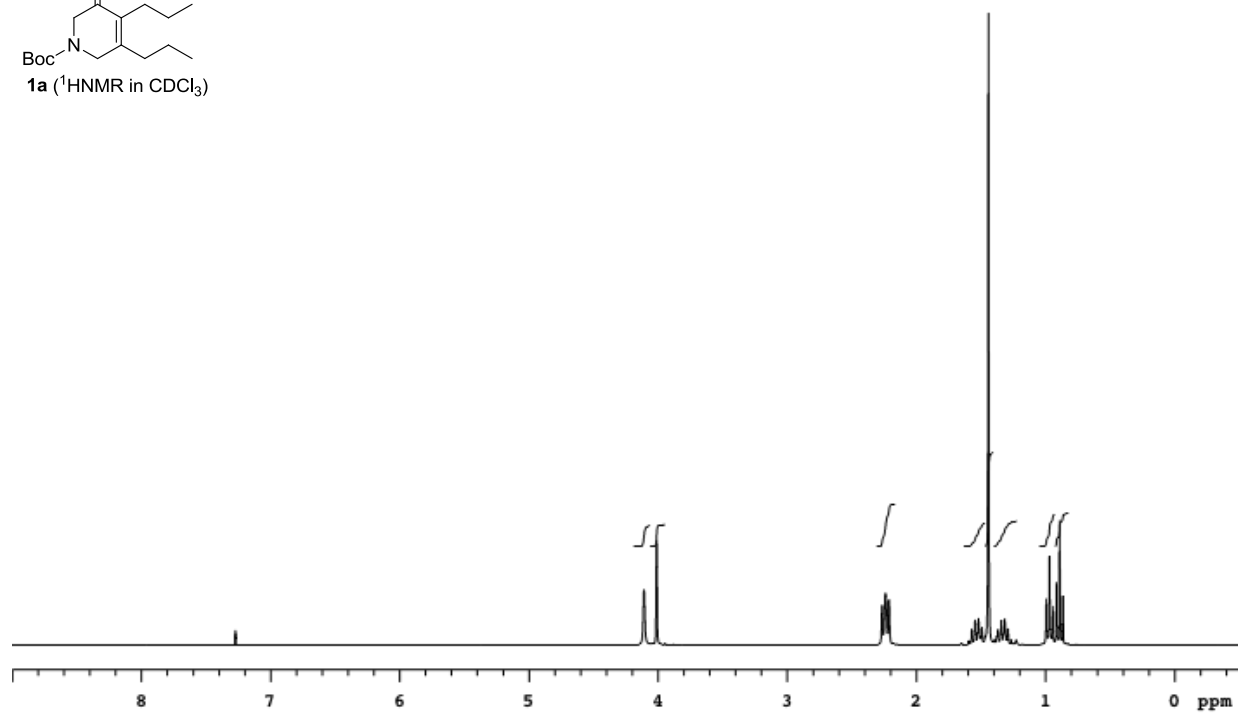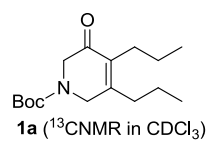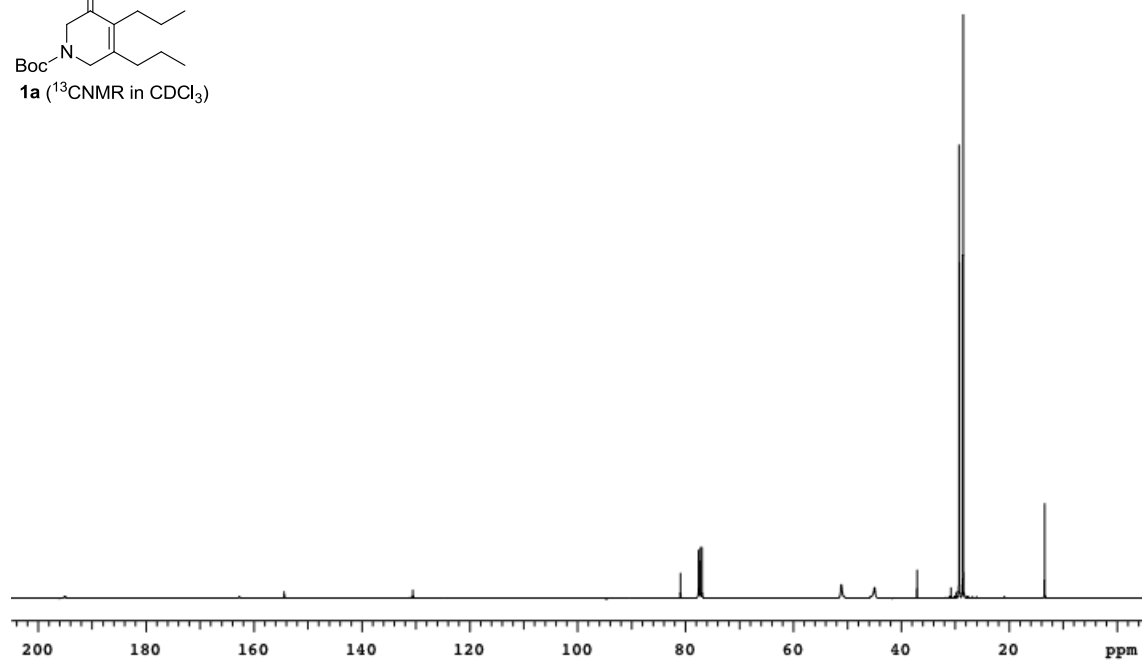

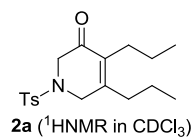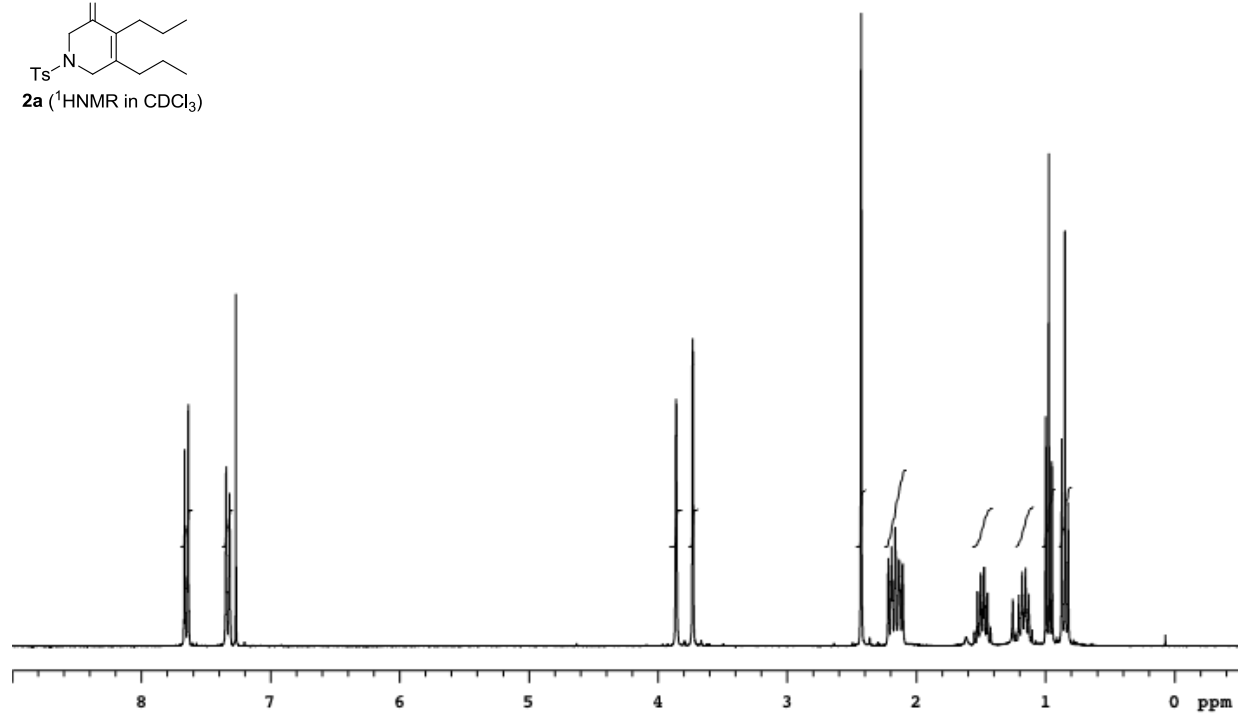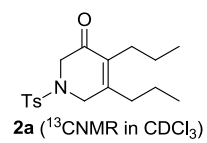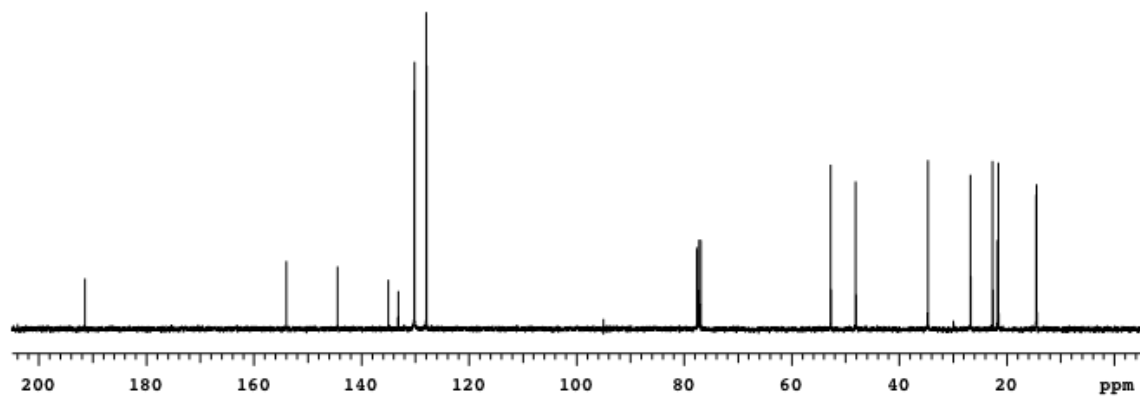

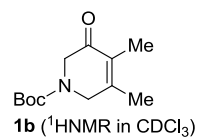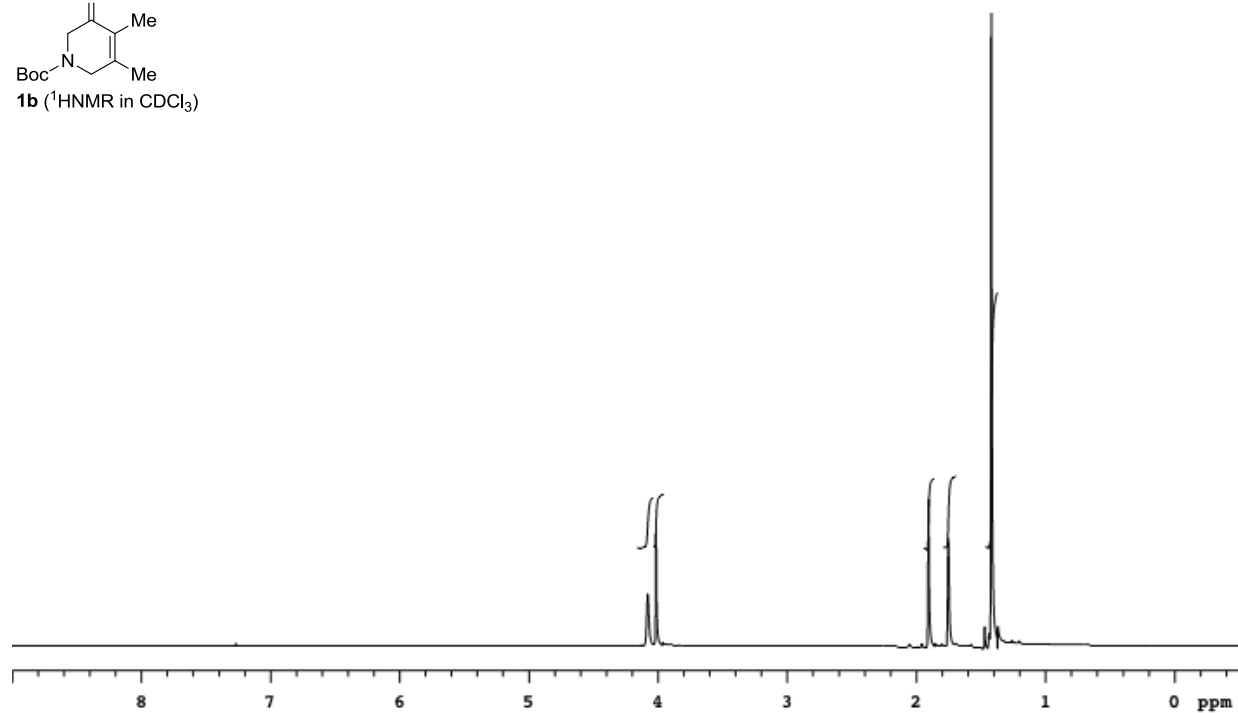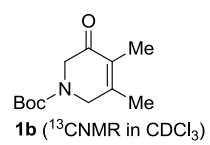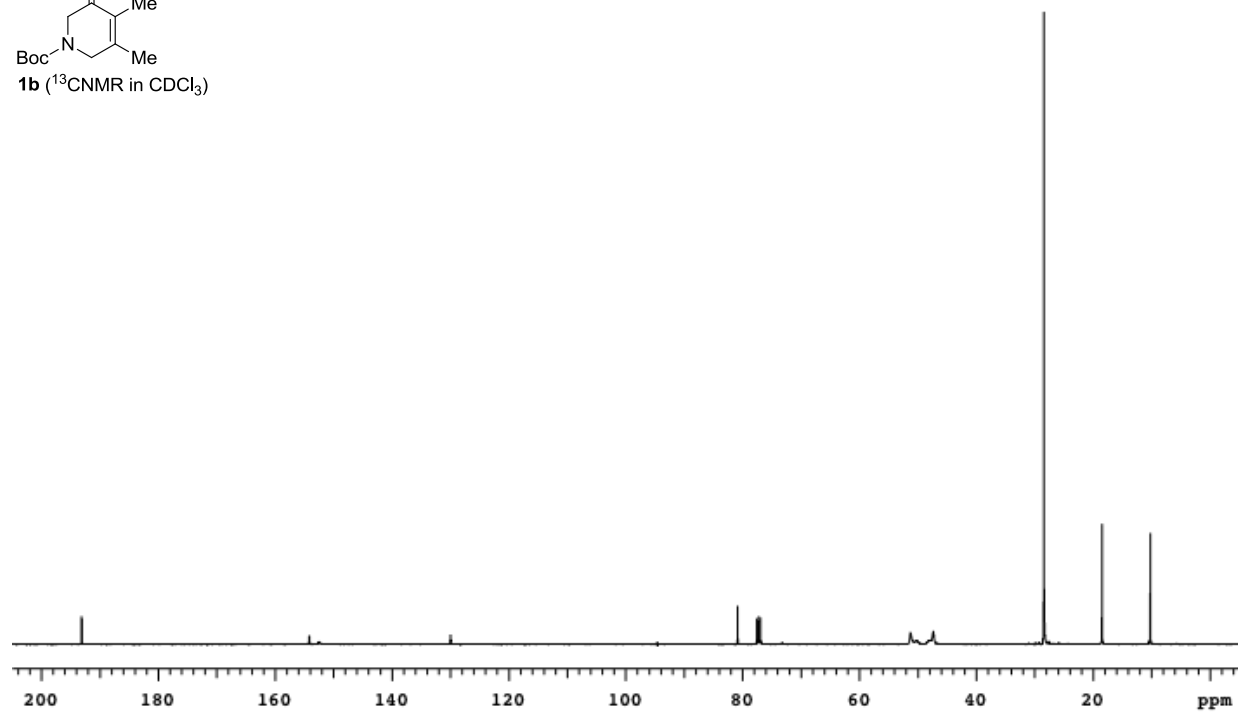

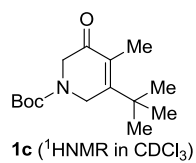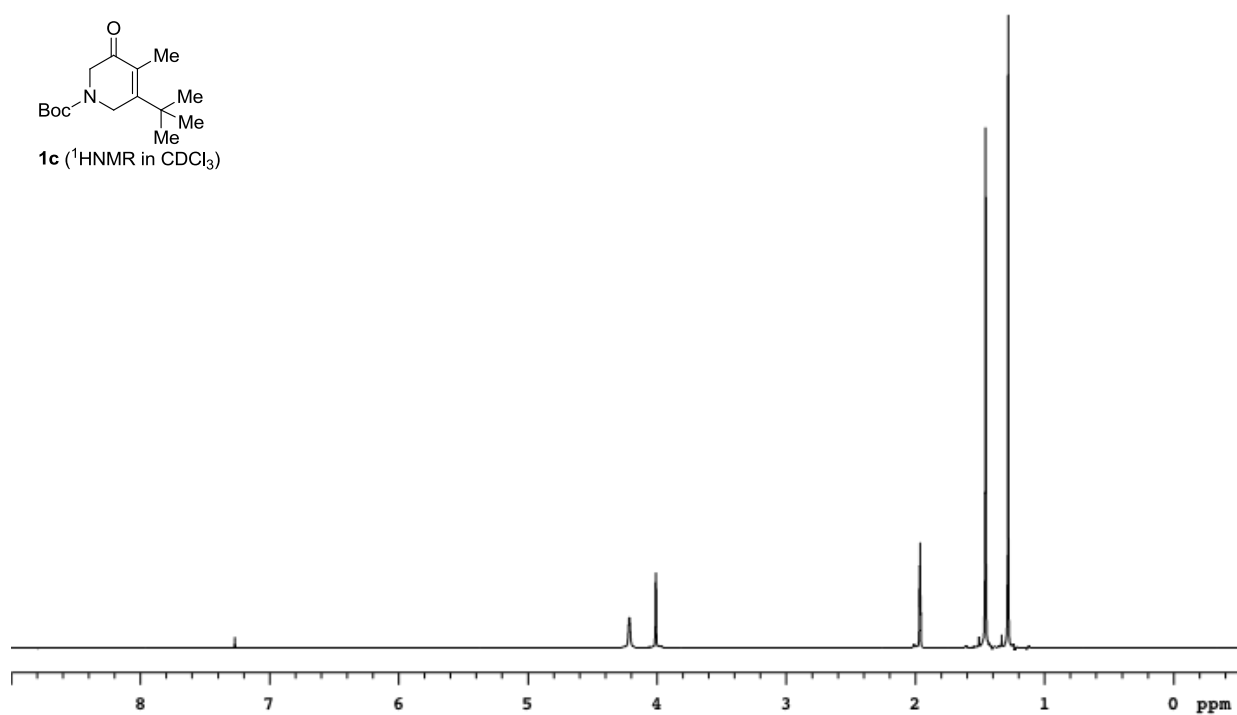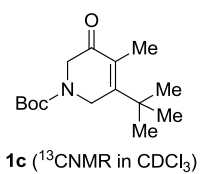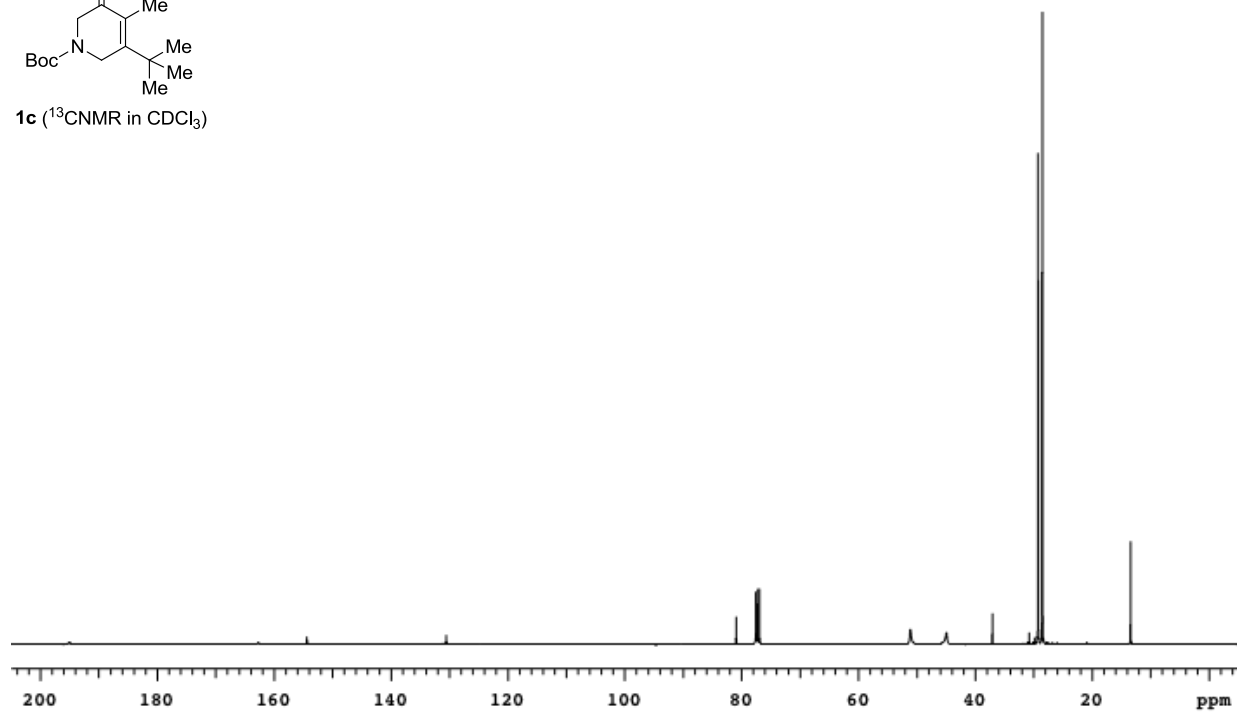

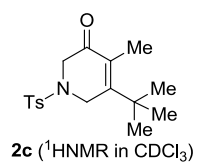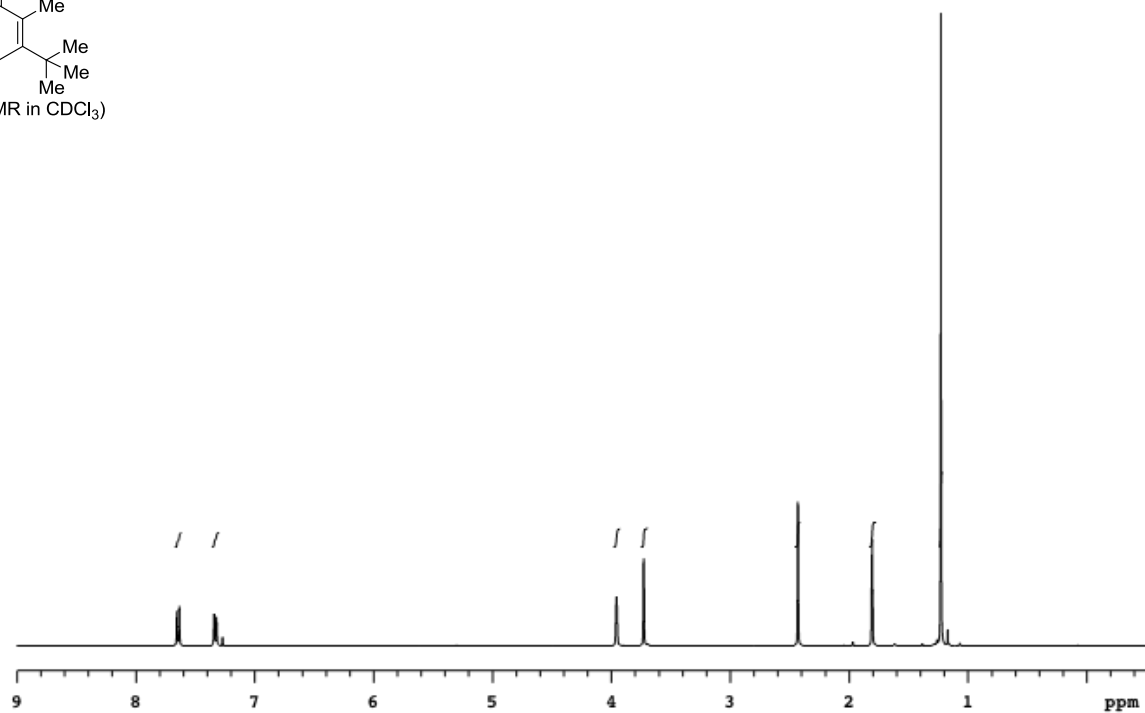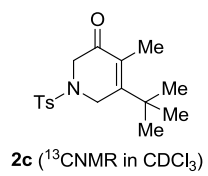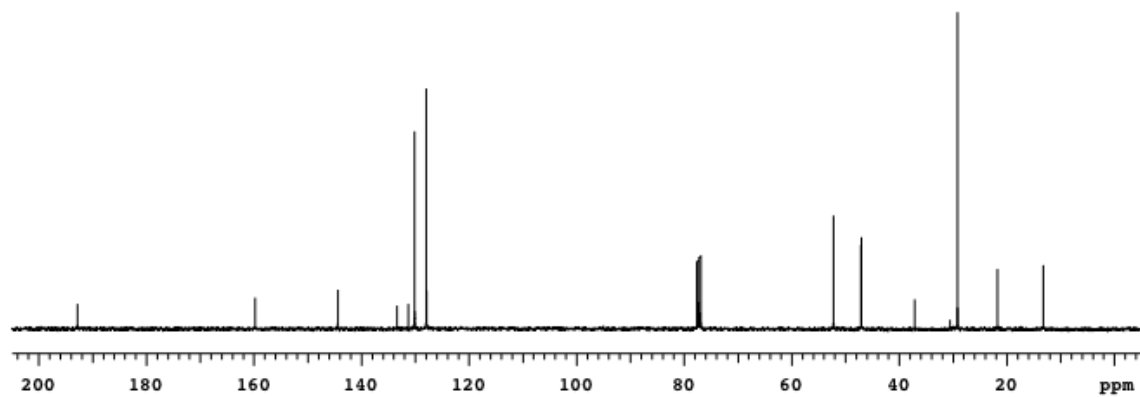

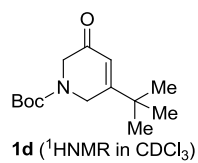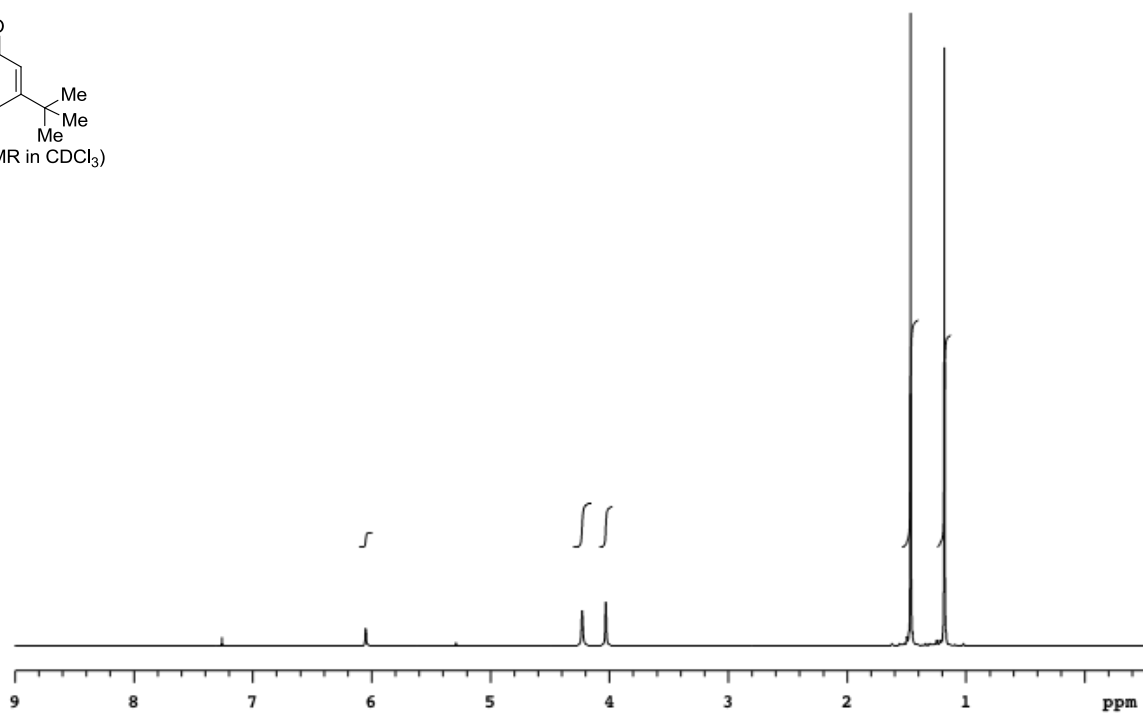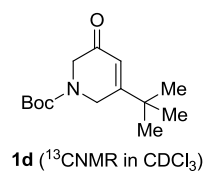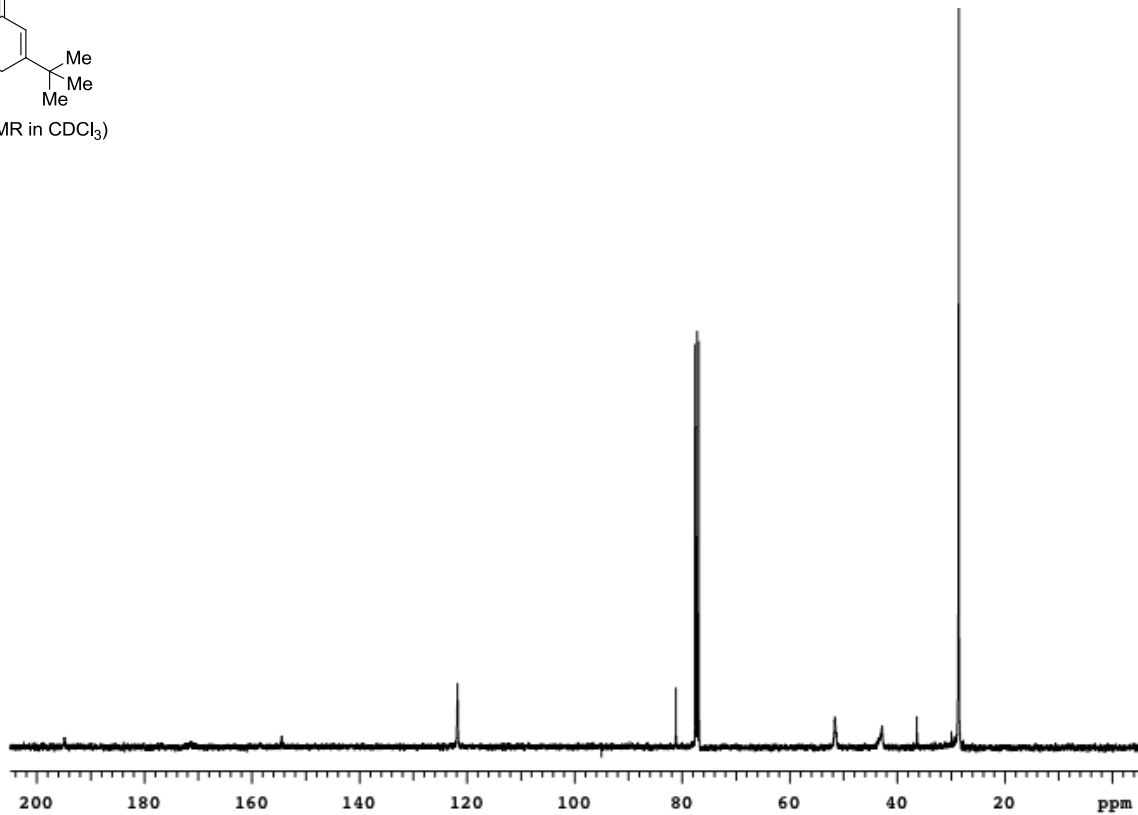

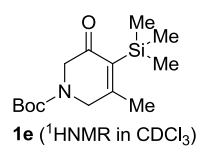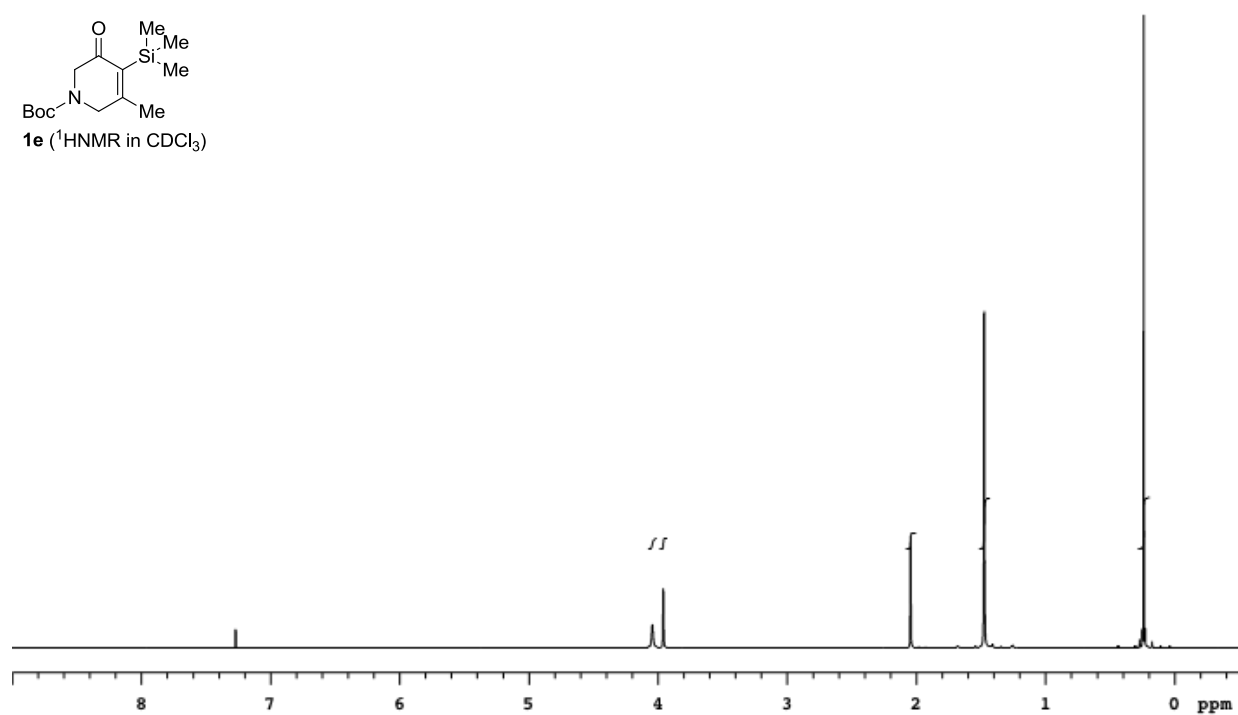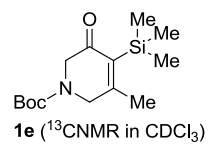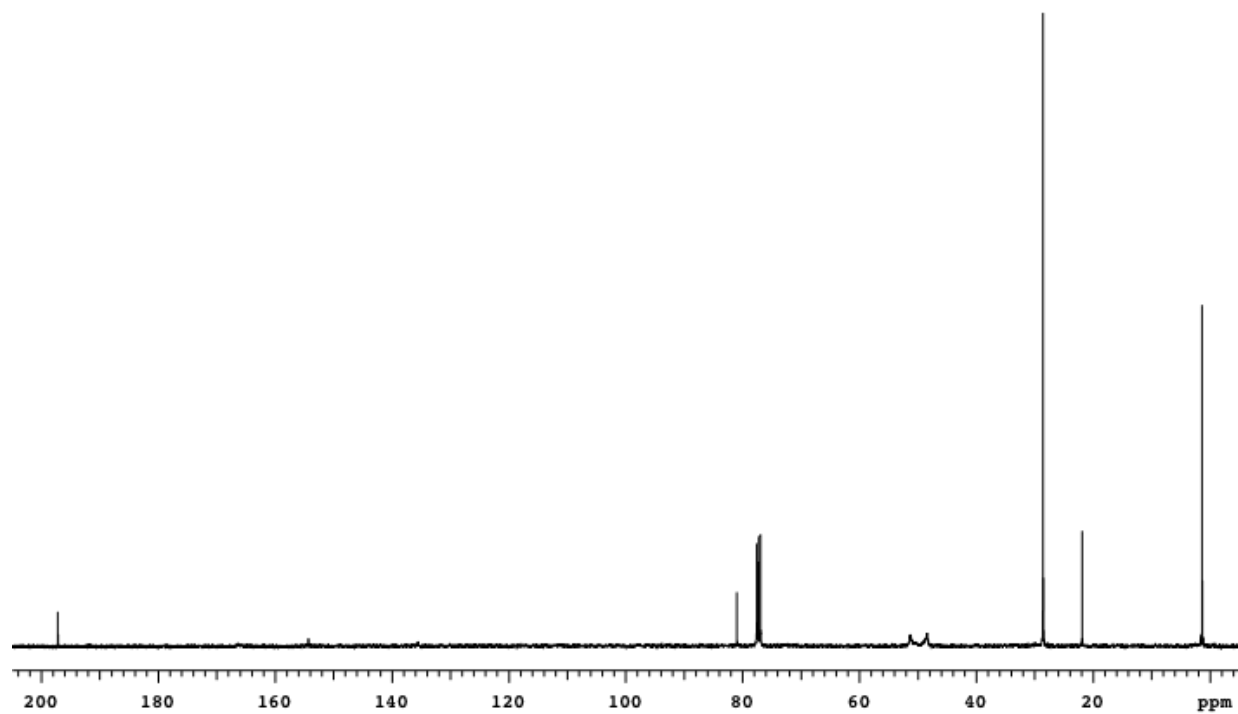



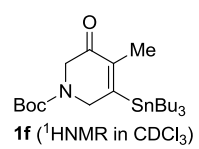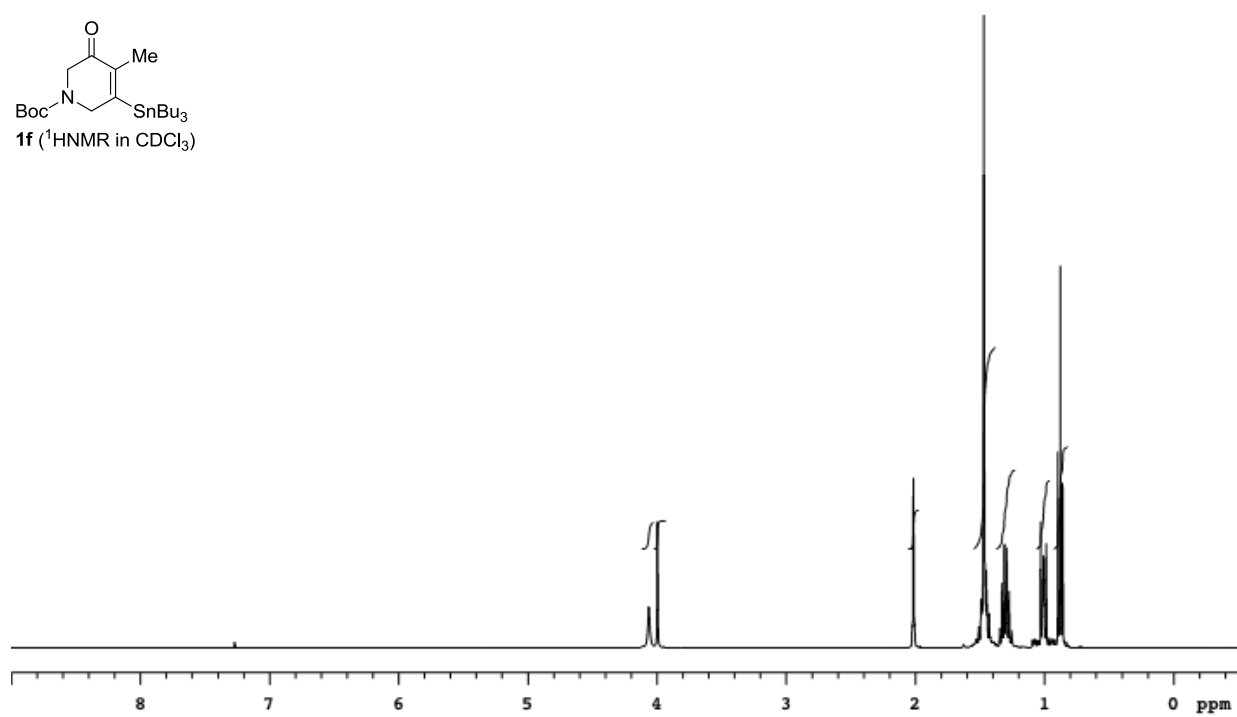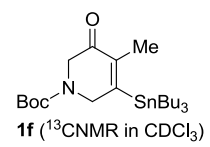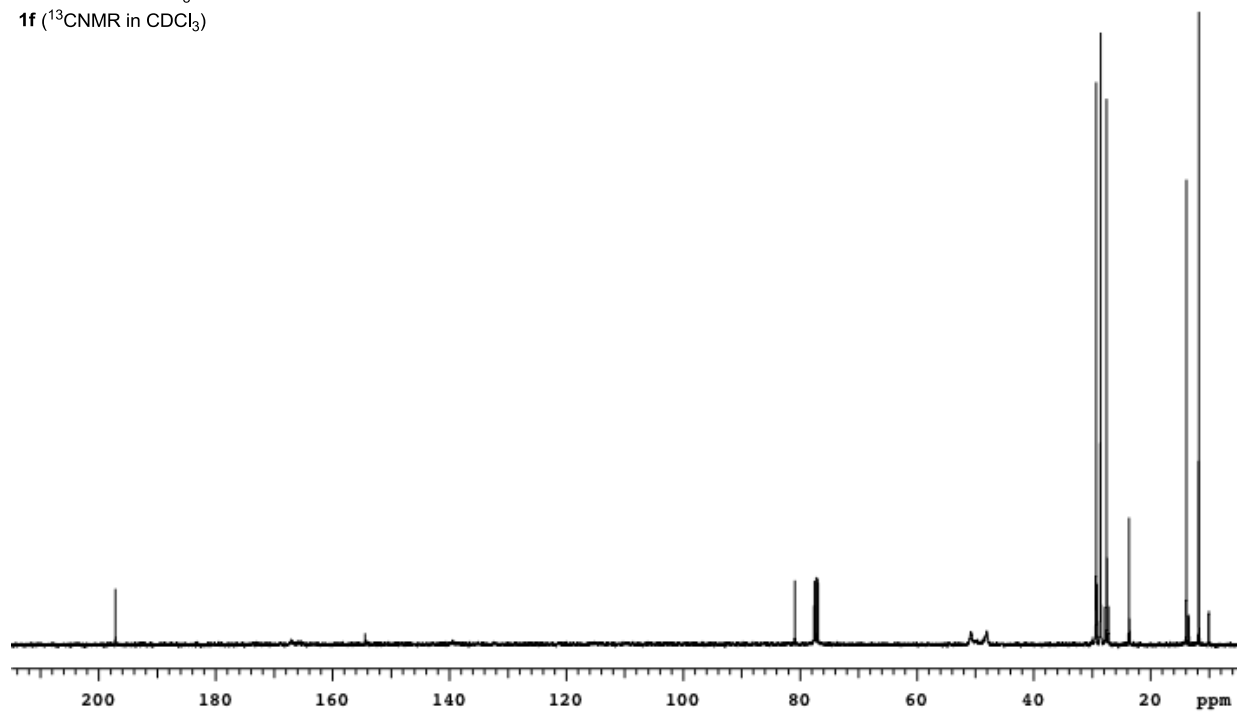

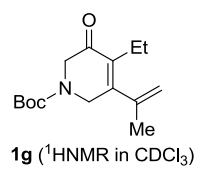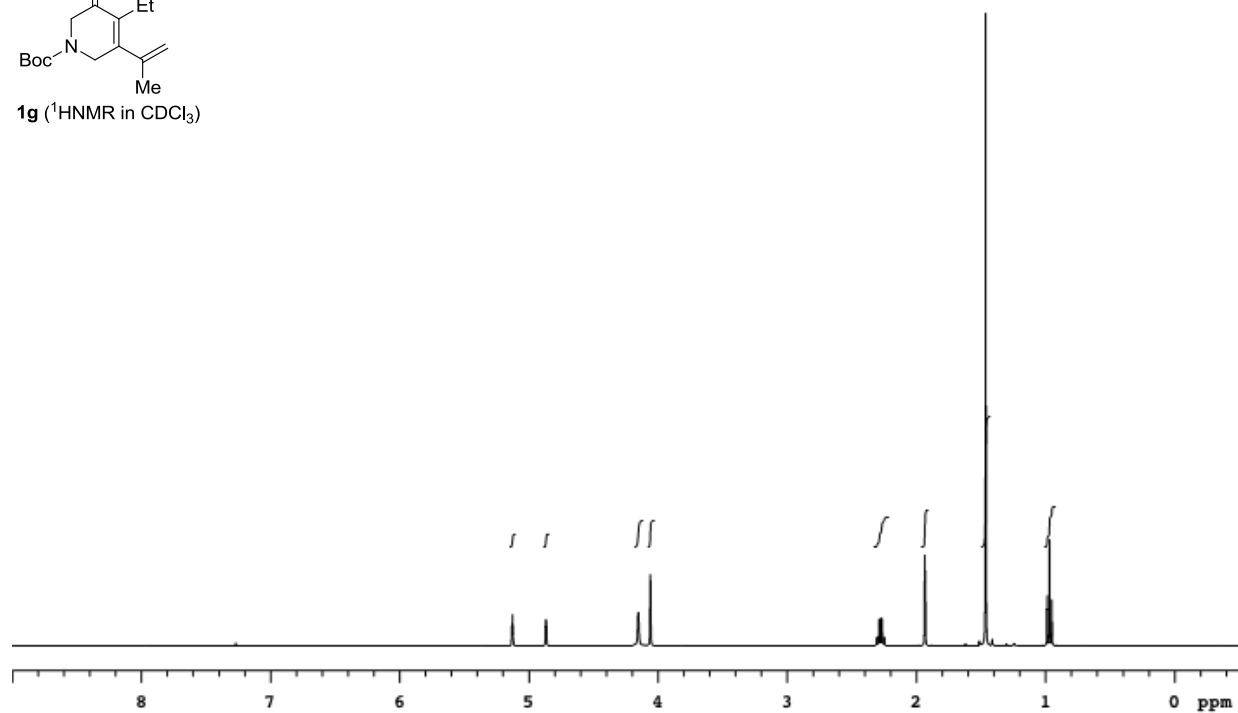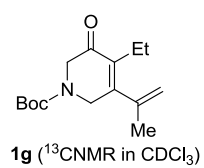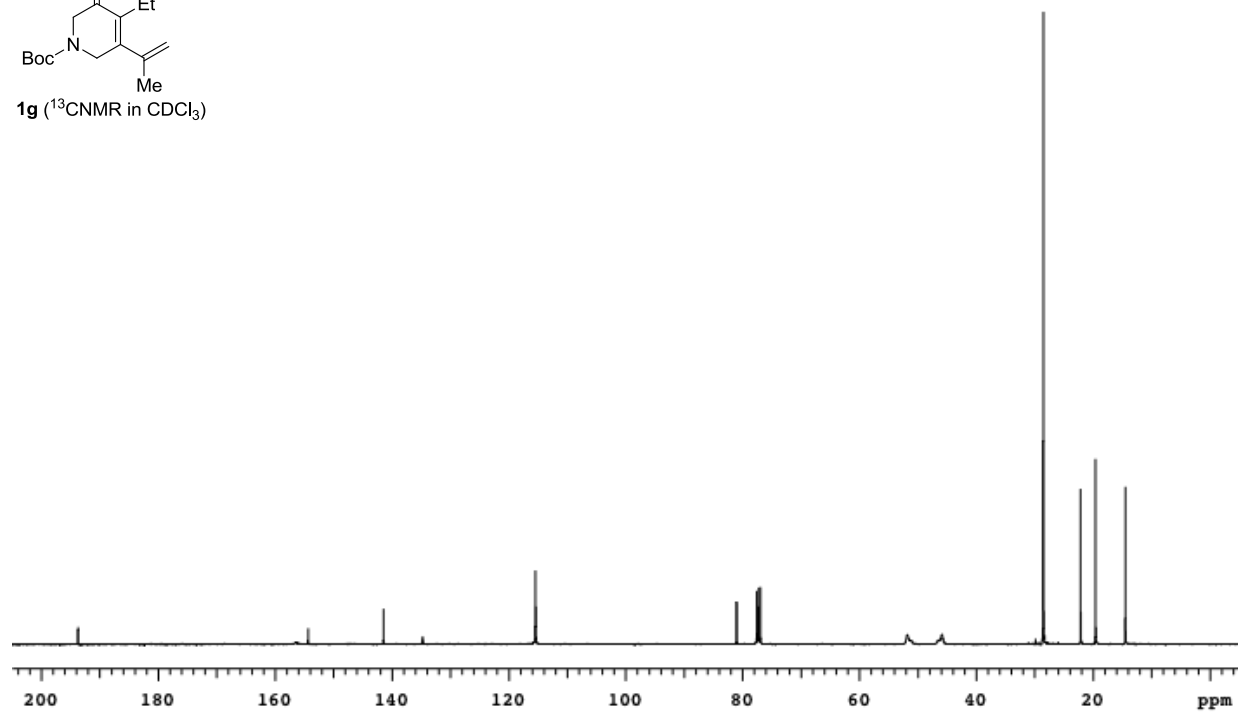

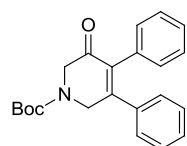

**1h** ( $^1\text{H}$ NMR in  $\text{CDCl}_3$ )

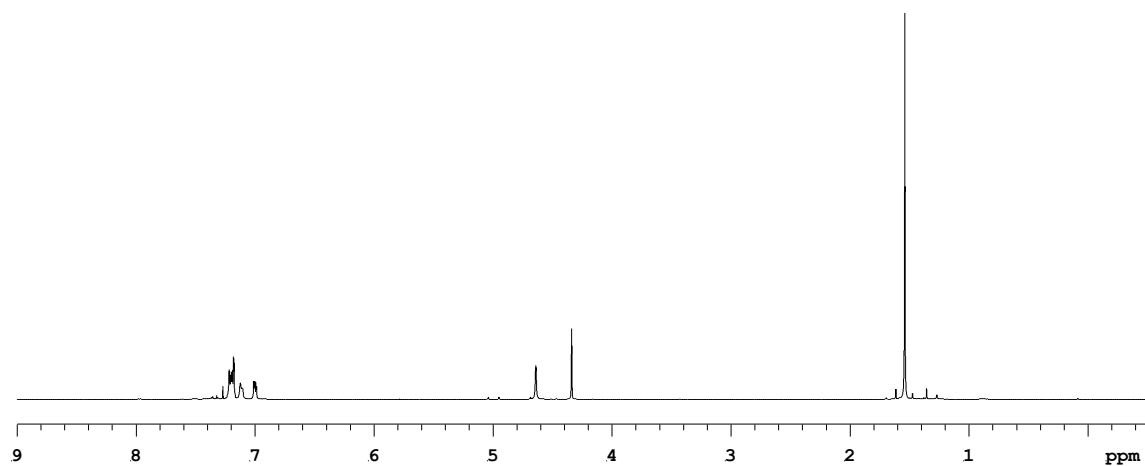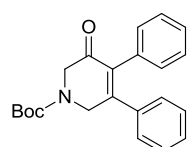

**1h** ( $^{13}\text{C}$ NMR in  $\text{CDCl}_3$ )

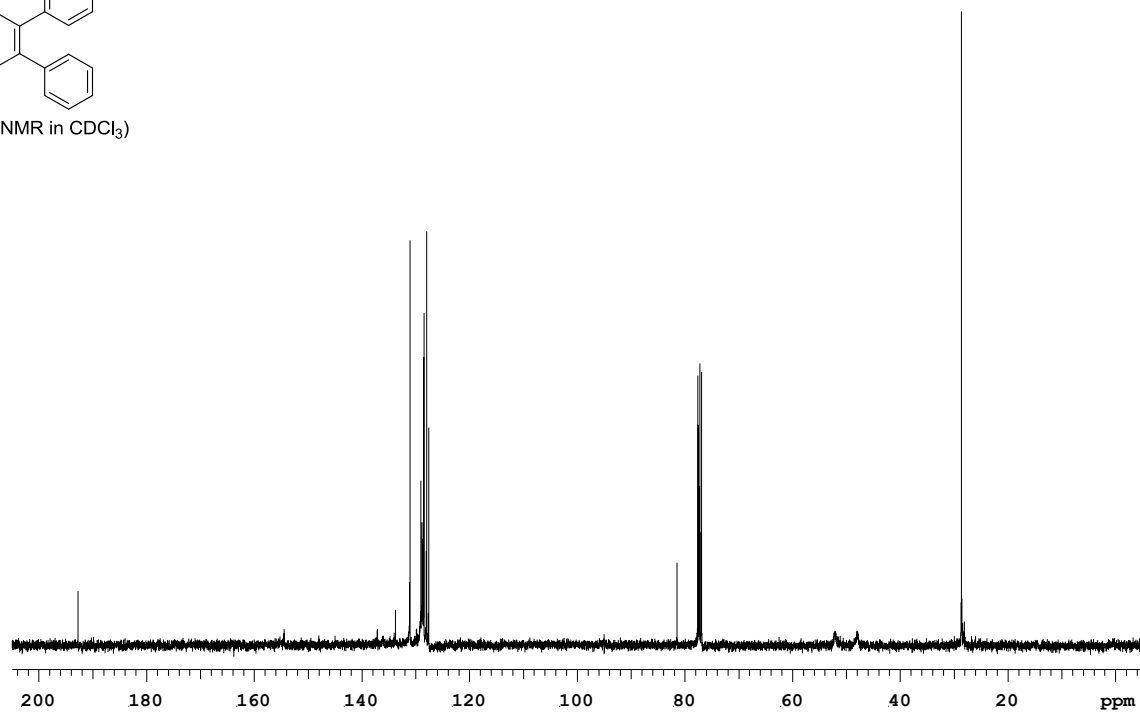

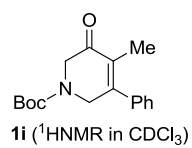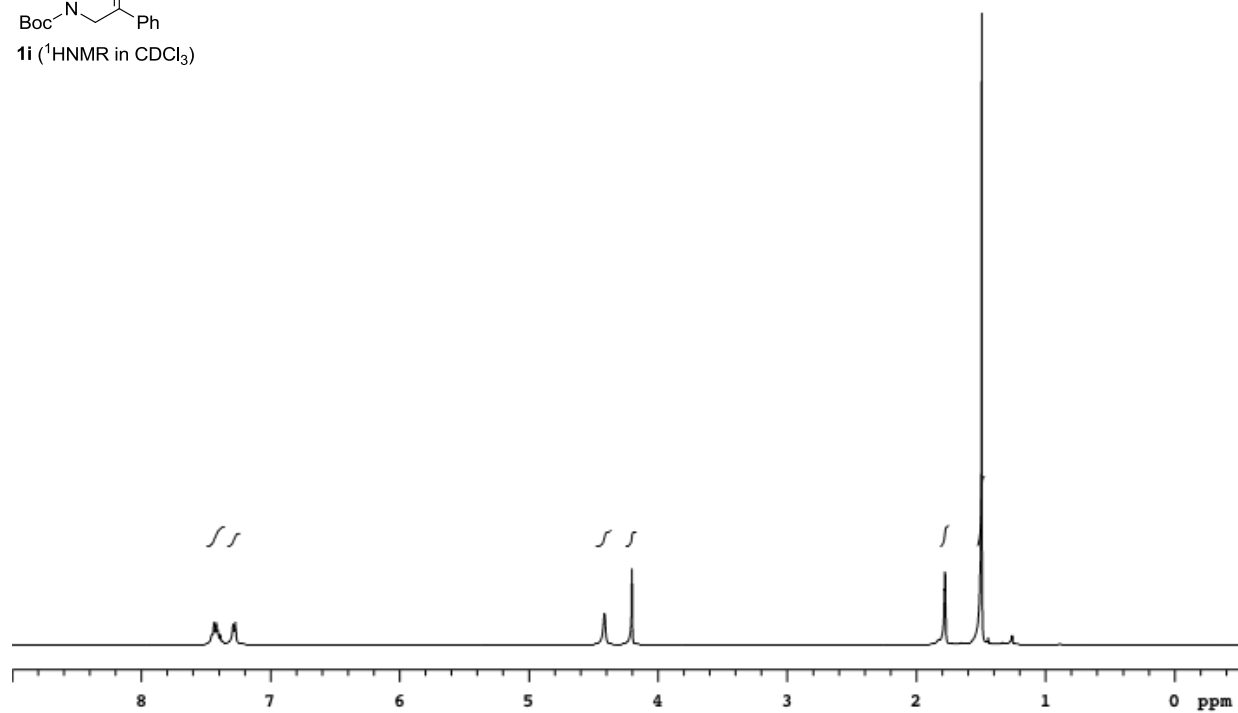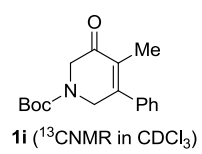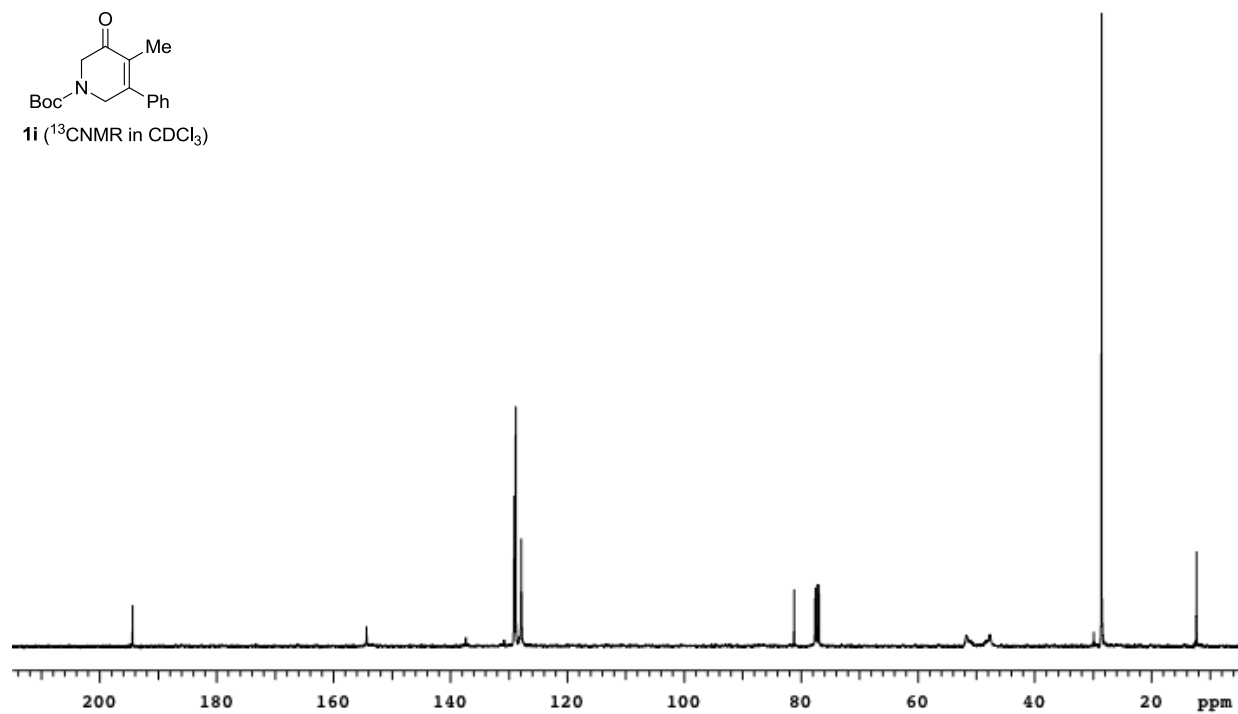

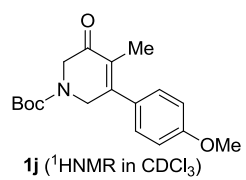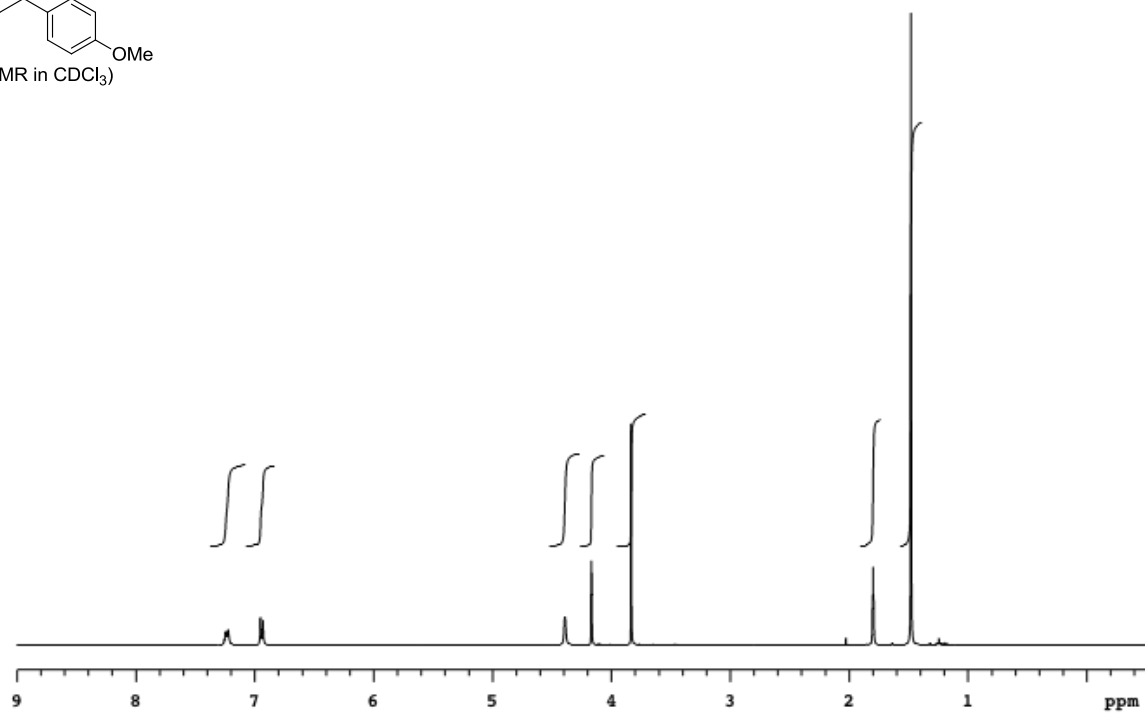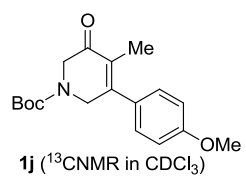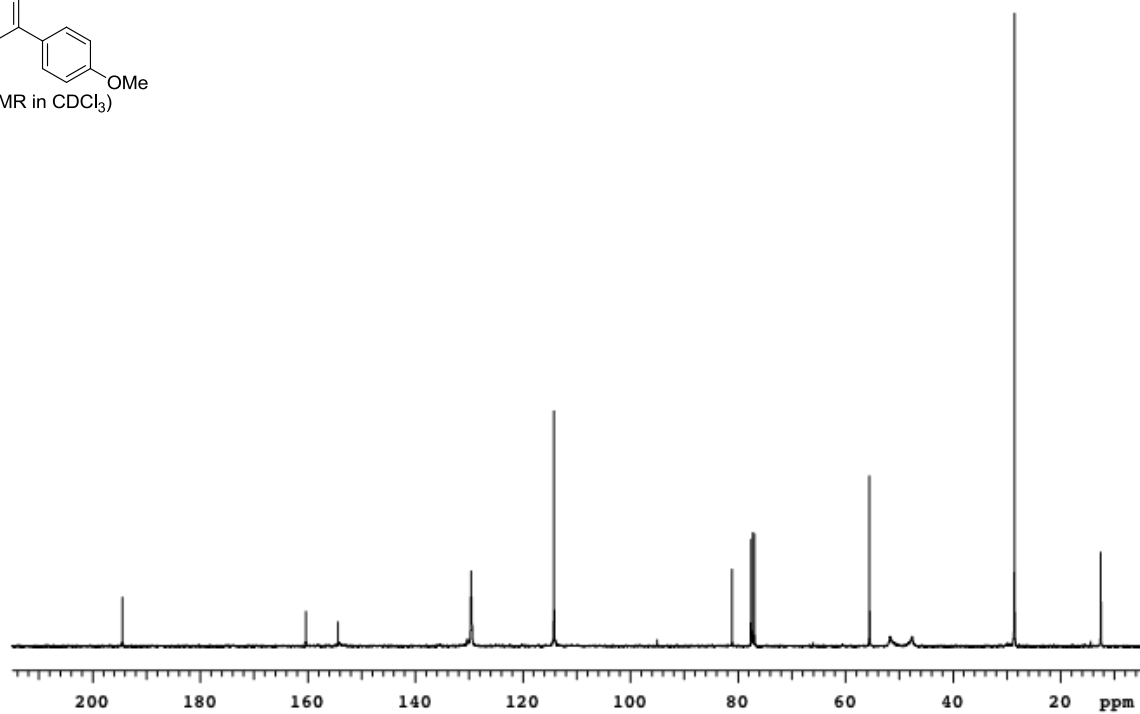

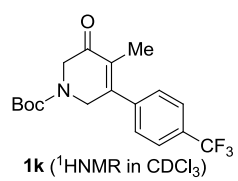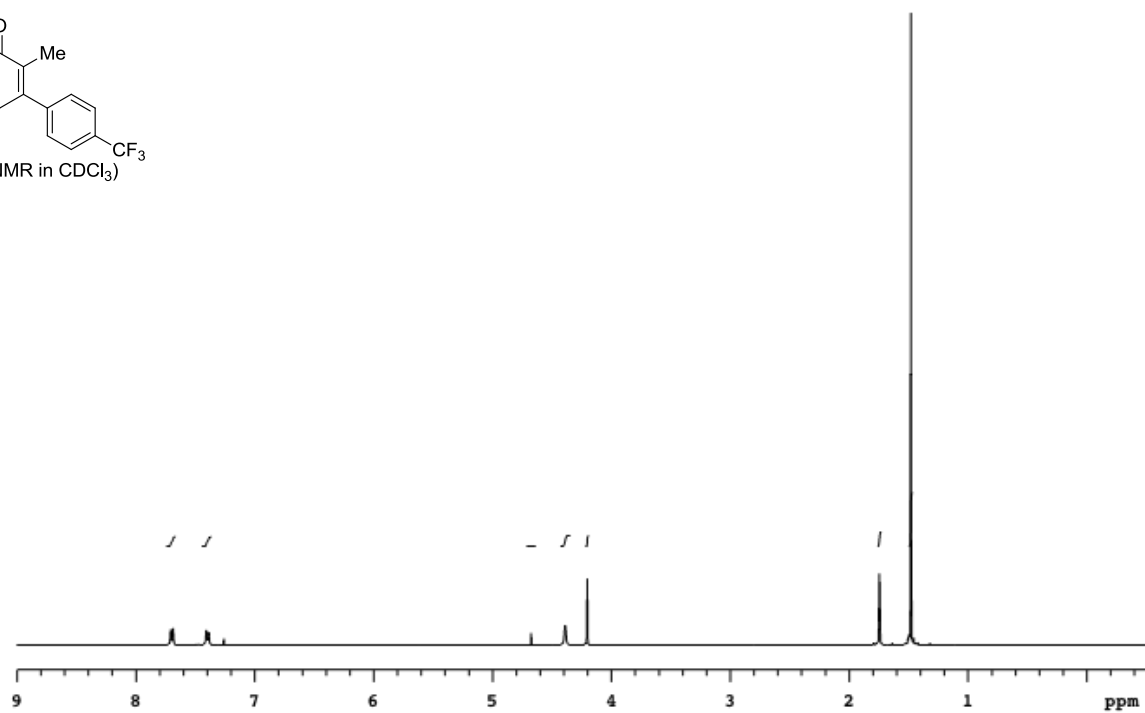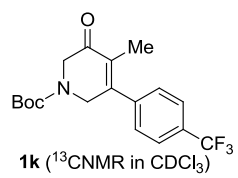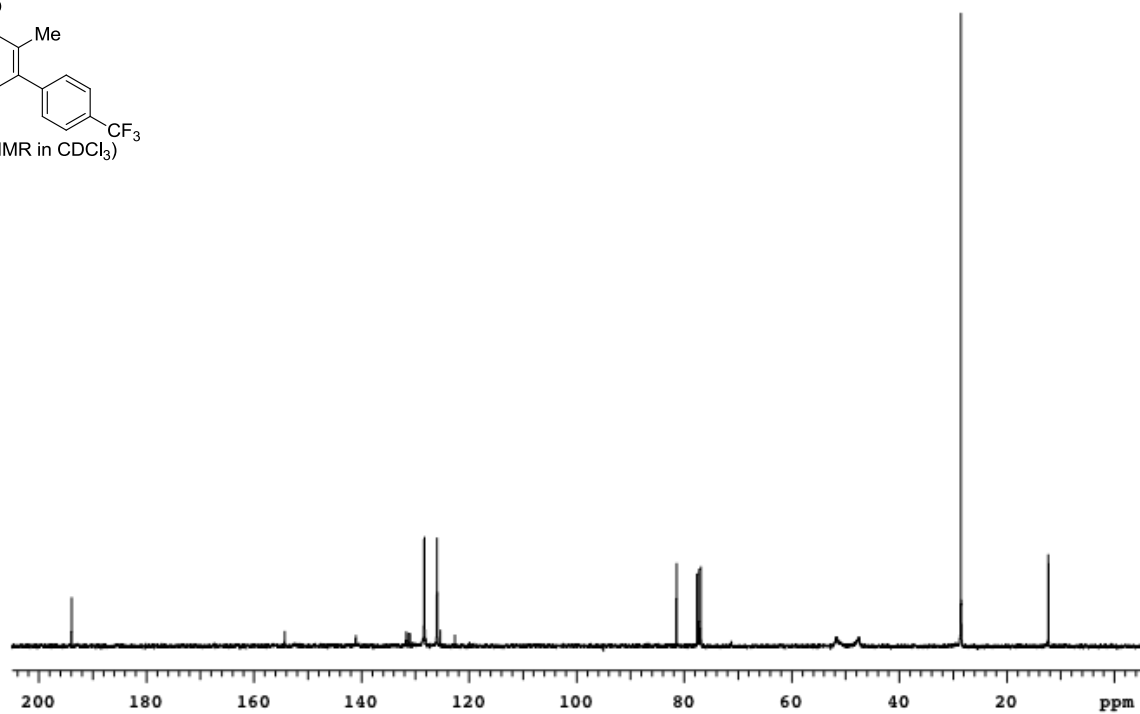

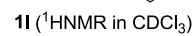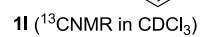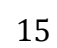

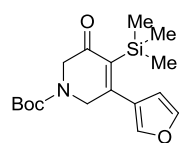

**1m** ( $^1\text{H}$ NMR in  $\text{CDCl}_3$ )

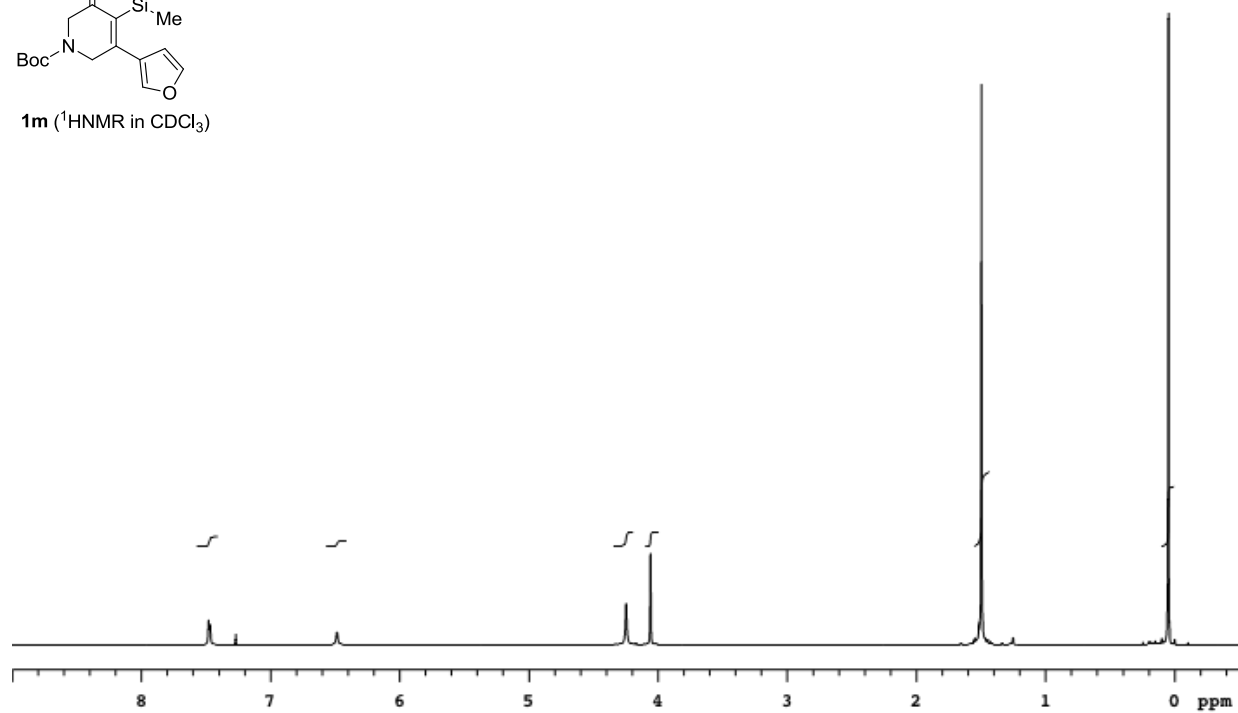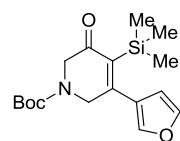

**1m** ( $^{13}\text{C}$ NMR in  $\text{CDCl}_3$ )

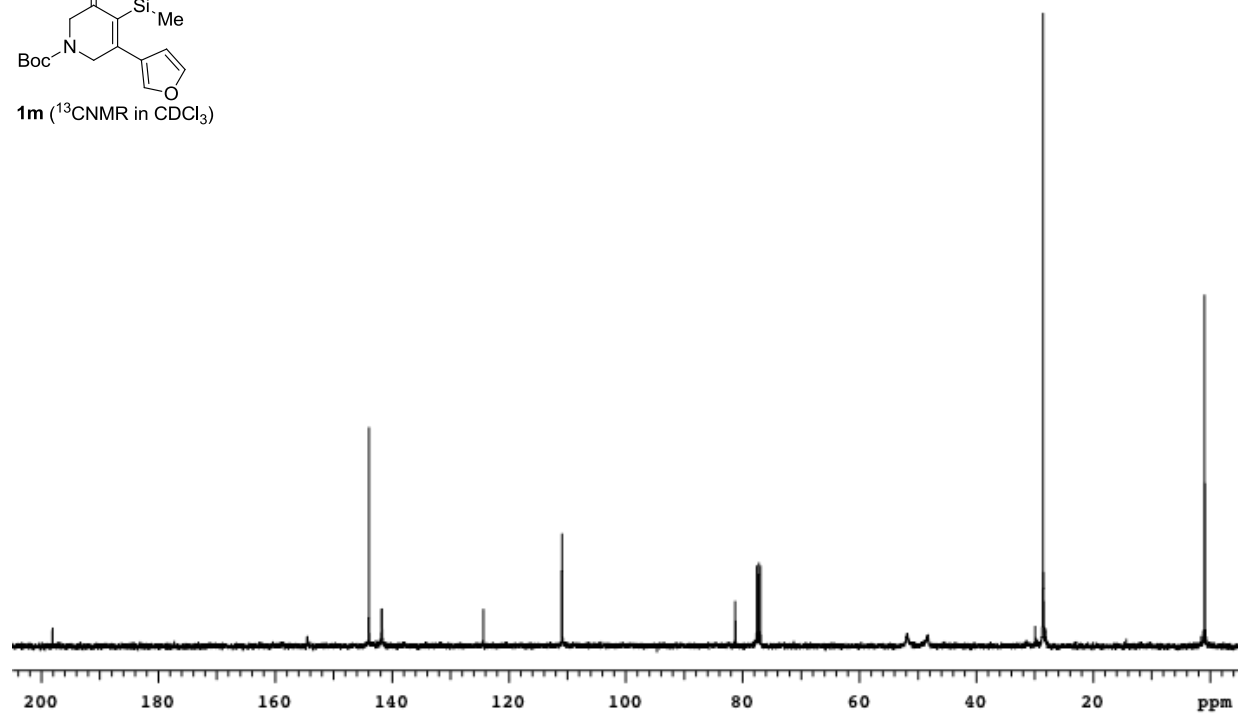



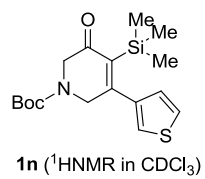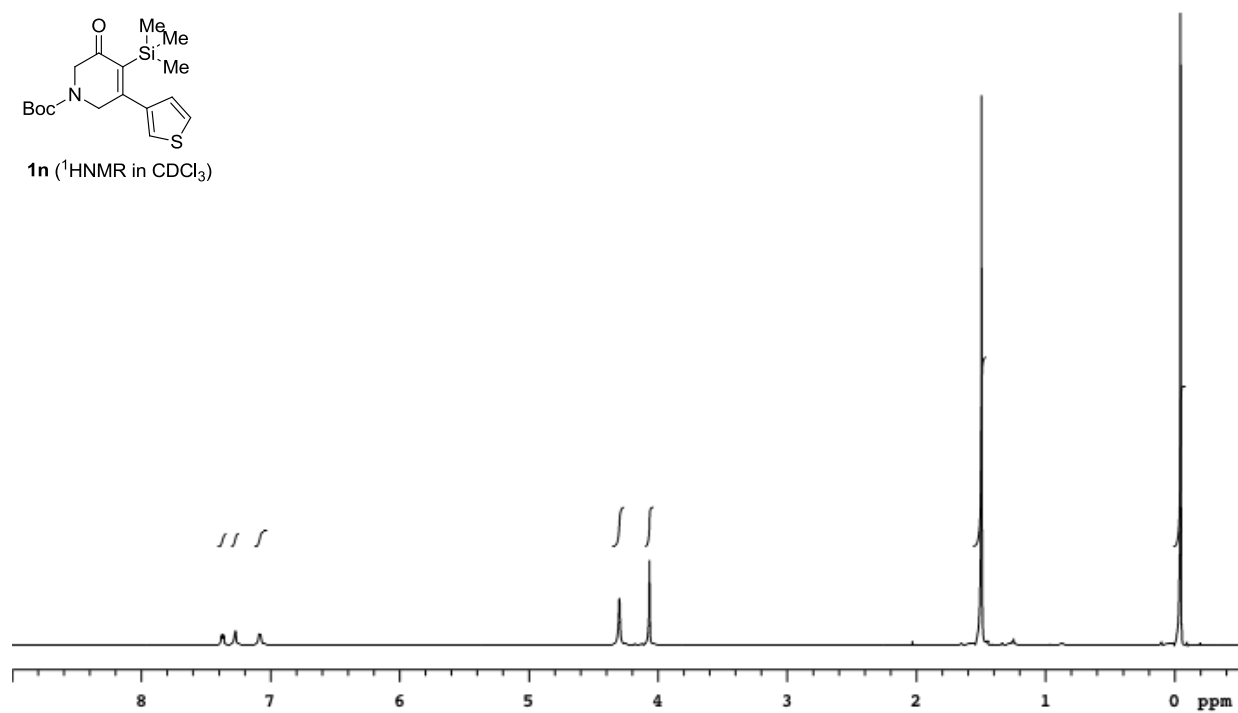

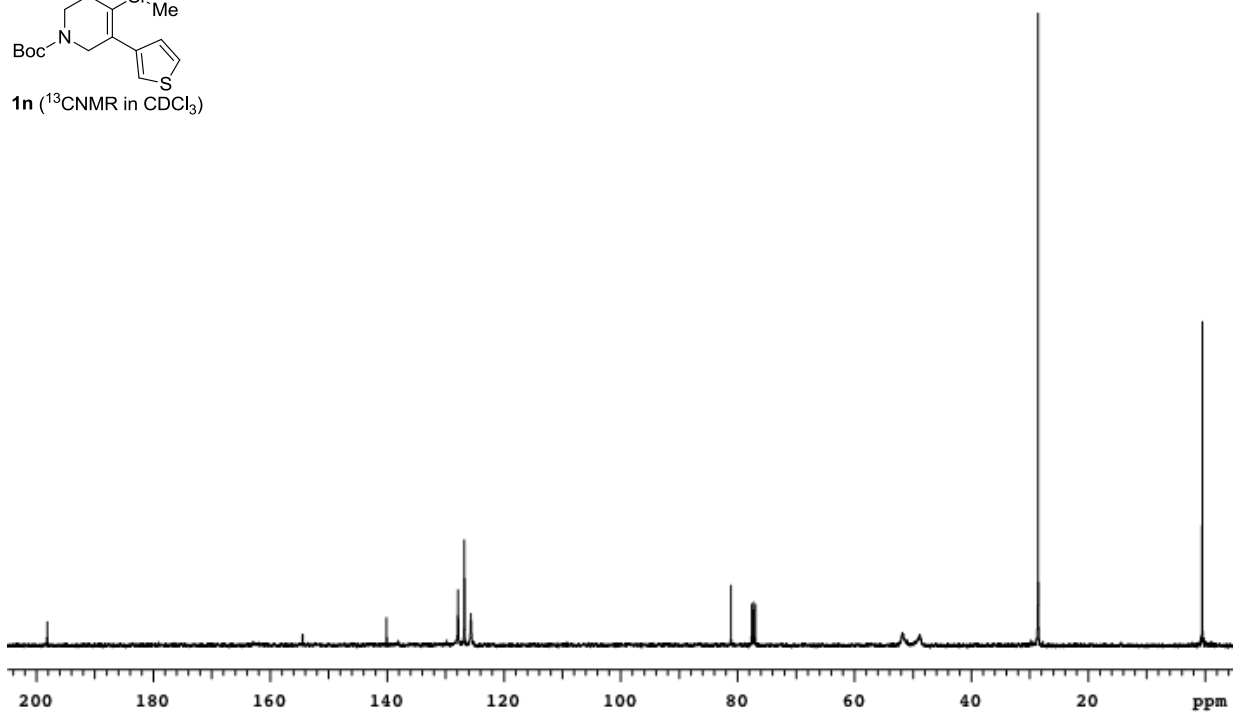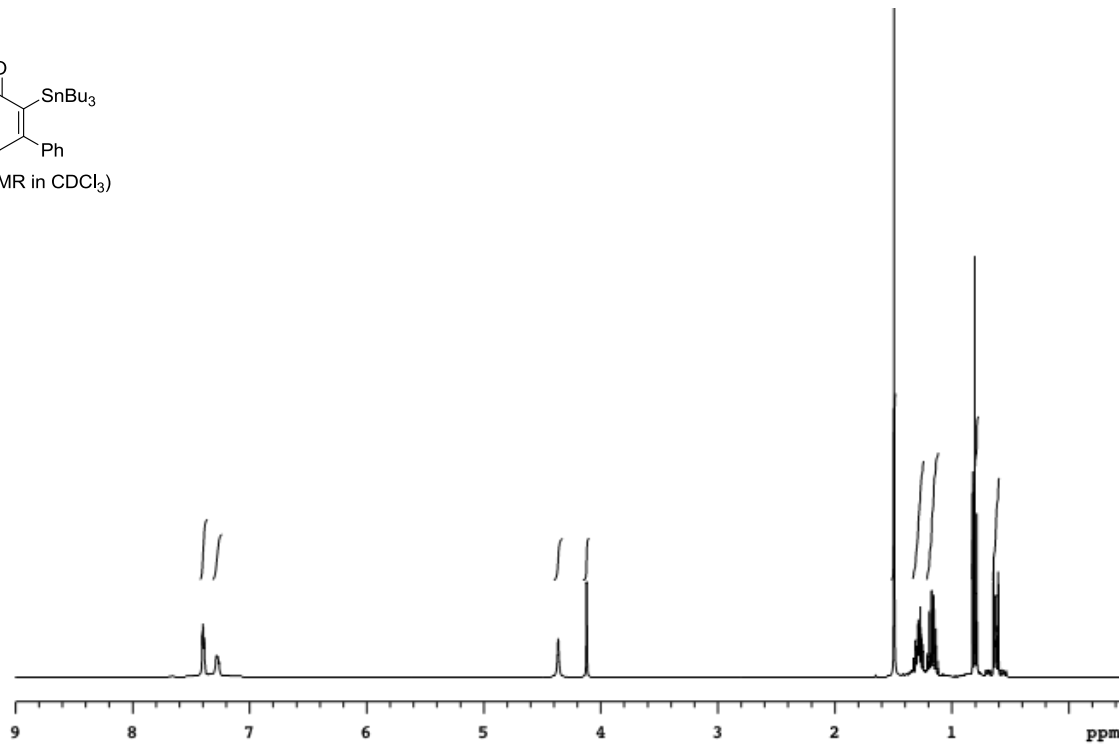

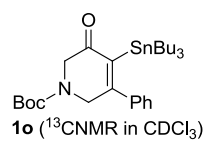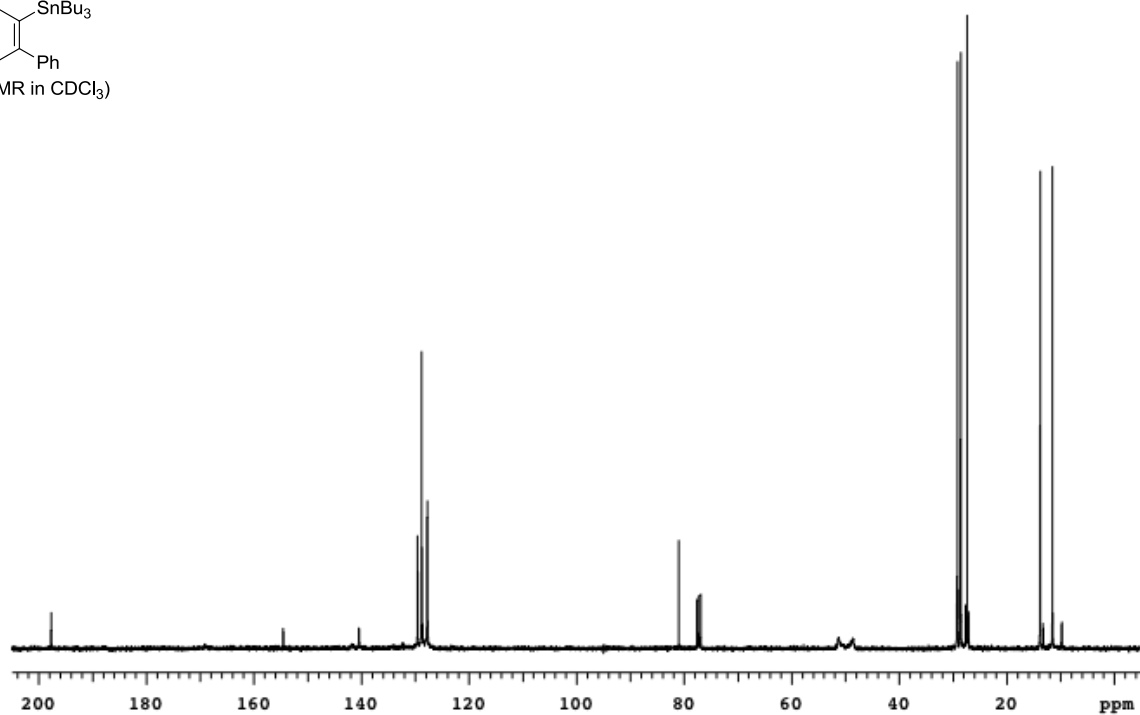

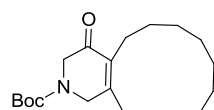

**1p** ( $^1\text{H}$ NMR in  $\text{CDCl}_3$ )

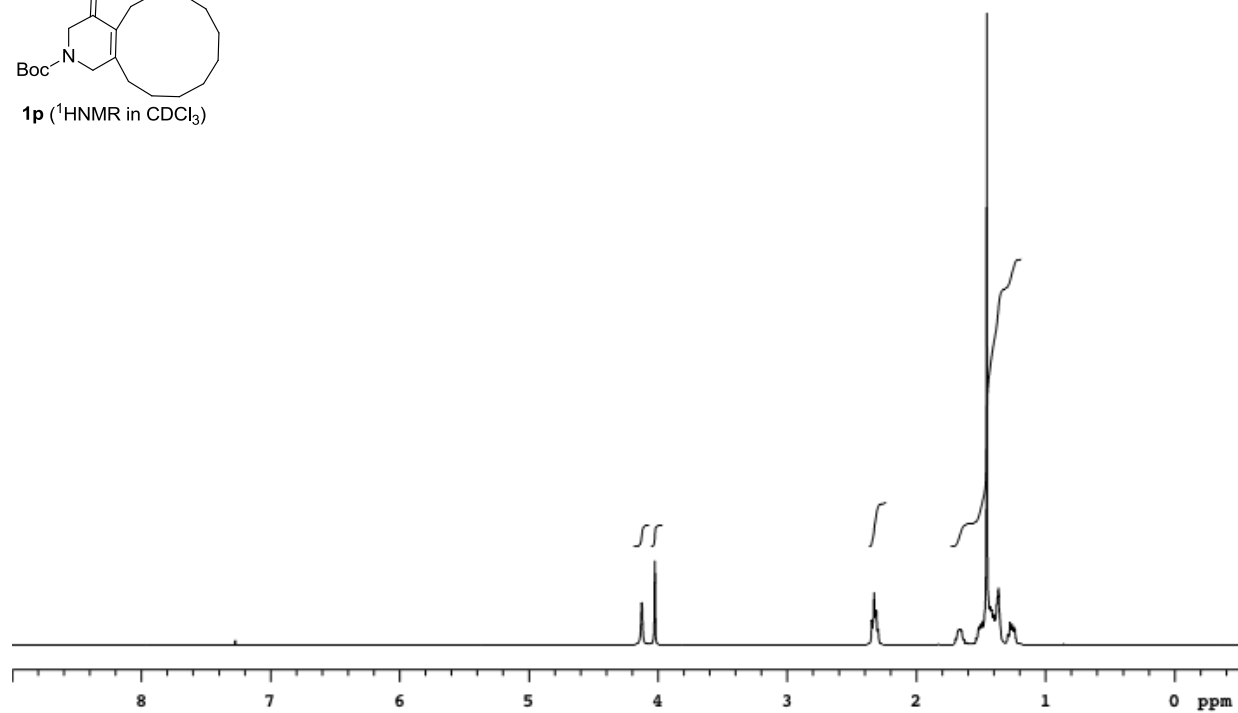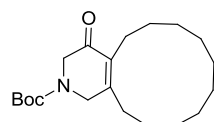

**1p** ( $^{13}\text{C}$ NMR in  $\text{CDCl}_3$ )

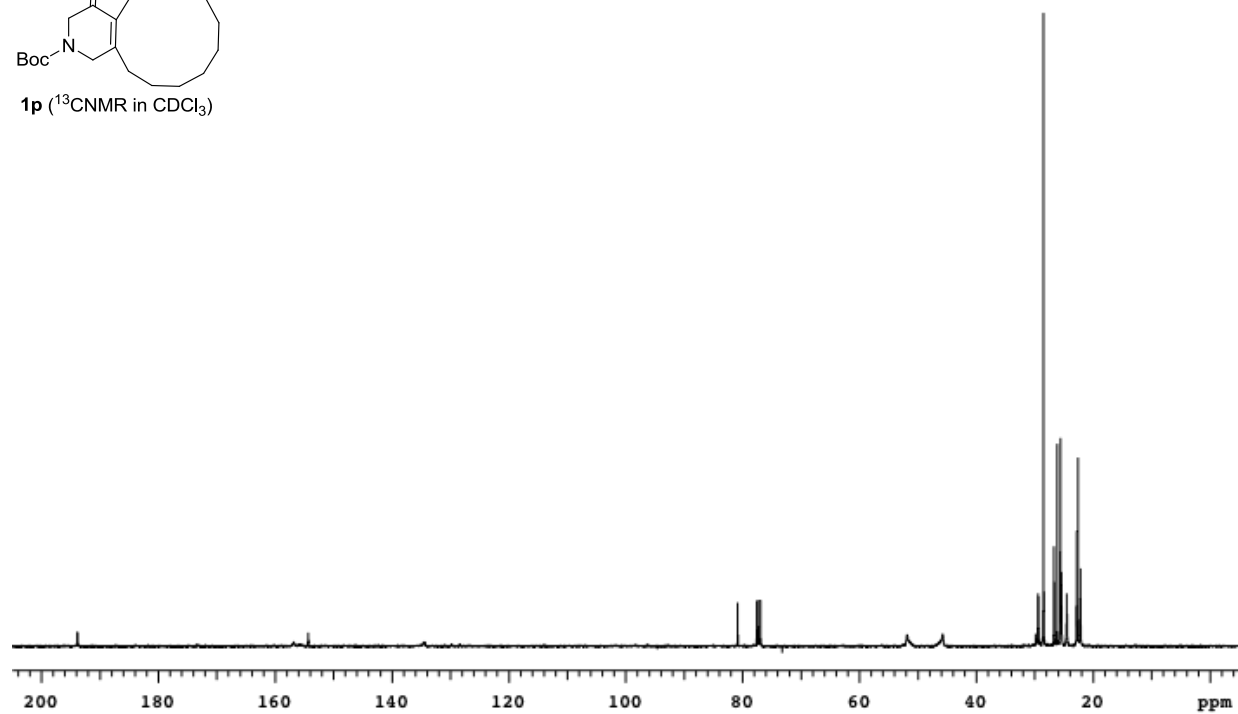

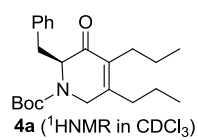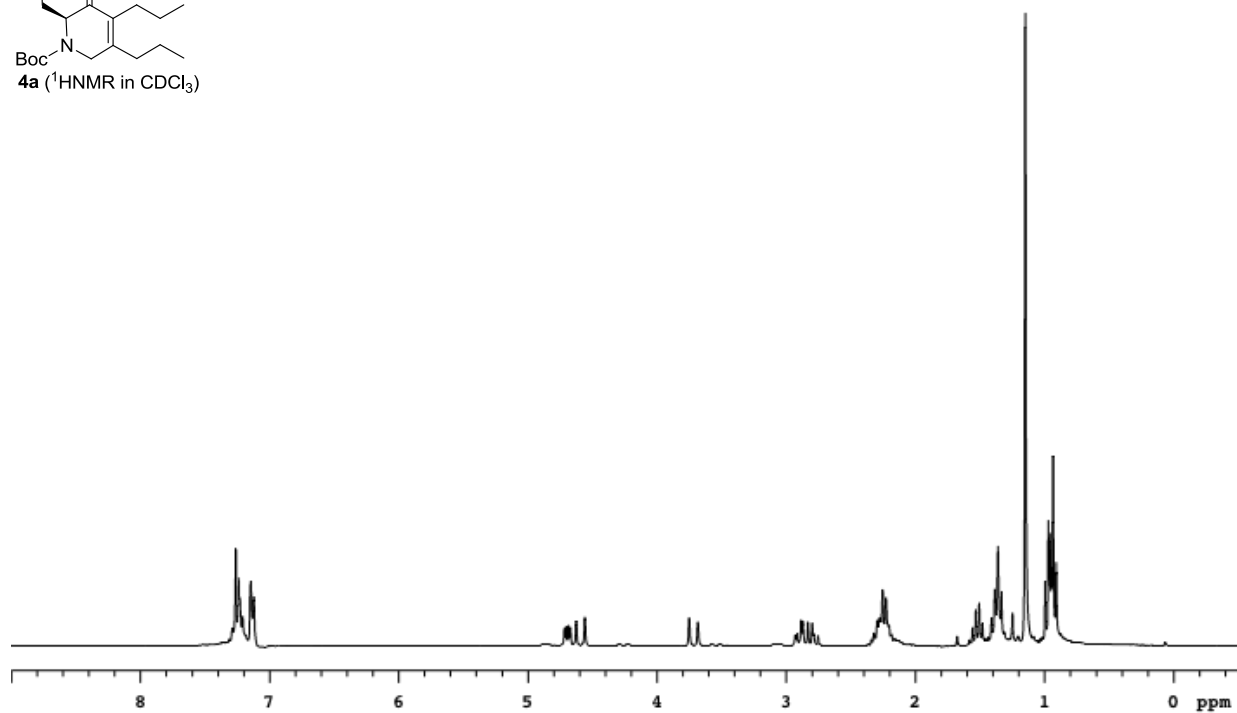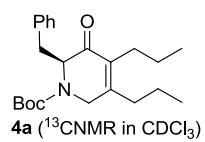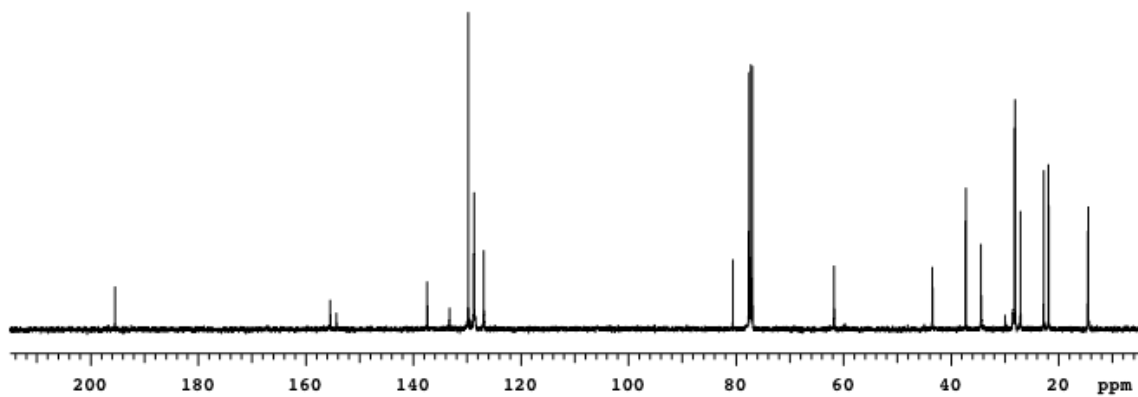

Supplement: Supplementary file 1 [file 4172449]
